# Supplementary material for: Comparative Metabolomics and Molecular Phylogenetics of Melon (Cucumis melo, Cucurbitaceae) Biodiversity
Source: MDPI journal article supplement (doi:10.3390/metabo10030121), 2020-03-24
Supplement: s1 [file s1]

*Title:* Comparative metabolomics and molecular phylo-genetics of melon (*Cucumis melo*, Cucurbitaceae) biodiversity

*Authors:* Moing et al.

*Journal:* Metabolites

**Supplementary figures, S1-S4**

A) CLUSTAL O(1.2.4) multiple sequence alignment

```

PI435288  AGCAAGCGTAAATTTCCAGGTAAGGCTAGGATCCRGATATAAACCGATATAACGAA  60
FAQ       AGCAAGCGTTCAATTTTCCAGCTAAAGGGTAGGATCCGRTATAGGCCGATACAAACGTG  60
PMR45     AGCAAGCGCAAAATTTTCCACCTCGTGGGCTAGGATTTAGTAAAAACCGACACAAAGGTA  60
HBJ       AAATGGCGCAAAATTTTCCACCTCGTGGGCTAGGATTTAGTAAAAACCGATATAACGAA  60
BES       AAATGGCGCAAAATTTTCCAGCTAAAGGGTAGGATTTAGTAAAAACCGATATAACGAA  60
OHG       AAATGGCGCTCTATTCTTAGCTAAAAAGCTCGGACCCGCAAAAAYSRRTMTMRCGAA  60
FRC       AAATGGCACTCTATTCTTAGCTAAAAAGCTCGGACCCGCAAAAACCGATATAACGAA  60
BSK       AAATGGCGCTCTATTCTTAGCTAAAAATCTCGGACCCGGCAAAAACCGATATAACGAA  60
PI149169  TATAARYGCAMAATTTTCCACCTCGTAATCTCAAGTCYGGTGCAGACCGATACAAACGAA  60
STA       AGCAAGCGCACTATTCTTACCTCGTGGGCTAGGATCCGGTATAGGCCGATATAACGAA  60
CRE       AGCAAGCGCAAAATTTTCCACCTCGTAGCTAGGATCCGGTAAAAACCGATATAACGAA  60
PI334107  TATAAATGCAAAATTTTCCACCTCGTAGCTAGGATCCGGTAAAAACCGATATAACGAA  60
PI201581  TATAAATGCAAAATTTTCCACCTCGTAGCTAGGATCCGGTAAAAACCGATATAACGAA  60
PSR       AAATGGCGCAAAATTTTCCACCTCGTAGCTAGGATCCGGTAAAAACCGATATAACGAA  60
HDG       AAATGGCGCAAAATTTTCCACCTCGTAGCTAGGATCCGGTAAAAACCGATATAACGAA  60
          ***      *      *      *      *      *
PI435288  ACTAGCTCAAGCGSYGWYRGTTAATAGGCCCGCCATTGACTATGWMCMWGGSTGRY  116
FAQ       ACTATTTCAAGCAGCGTCGGGTAAATAGGCCCGCCATTGGTCACATCCATGGCTGAT  116
PMR45     ACTATTTCAAGCRCCGTCGGGTGATAAGGCCCGCCATTGACTATGATCATCGGTGGC  116
HBJ       ACTATTTCAAGCGCGTCGGGTRATARGCCCGCCATTGACTATGWMCMWCGGTGGC  116
BES       TCCATTTCAAGCAGCGTCGRGTRATARGCCCGCCATTGACTATGTACTTCGGTGGC  116
OHG       ACTAGCTCAATTGSCCTCAGTGAGAGGATATAATGGCAACTATGTGTAACGGTGGC  116
FRC       ACTAGCTCAATCGGCGTCAGTGAGAGGATCYGCRYRACACGTGTAACGGTGGC  116
BSK       ACTAGCTCAATCGGCGTCAGTGAGAGGATCCGCCATTGACTACGTGTAACGGTGGC  116
PI149169  WCYATTCCGATCGGCGTCAGTTAATAGGCATAATGGCAACTATGTACTTCAGTGGC  116
STA       ACTAGCTCAAGCGGYGTAGTTAATAGGCATAATGGCAACTATGTACTTCGGTGGC  116
CRE       ACTATTTCAAGCGGCGTCAGTGAGAGGATATAATGGCAACTATGATCATCGGTGGC  116
PI334107  ACTAGCTCAAGCGGCGTCAGTGAGAGGATATAATGGCAACTATGATCATCGGTGGC  116
PI201581  ACTAGCTCAAGCGGCGTCAGTGAGAGGATATAATGGCAACTATGATCATCGGTGGC  116
PSR       ACTAGCTCAAGCGGCGTCAGTGAGAGGATATAATGGCAACTATGATCATCGGTGGC  116
HDG       ACTAGCTCAAGCACCGTCGGTGAGAGGATATAATGGCAACTATGATCATCGGTGGC  116
          * *      * *      *      *      *      *

```

B)

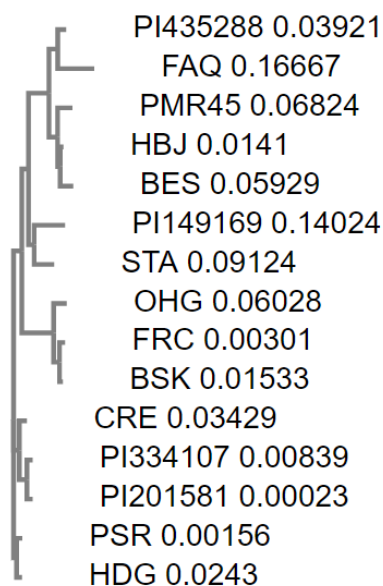

Figure S2. Classification of the seven accessions not included in the GBS analysis. A) Clustal alignment of the 116bp haplotype of the seven accessions together with GBS-analyzed closely related accessions. B) Phylogenetic tree developed by Neighbor-Joining method. Clustal Omega: <https://www.ebi.ac.uk/Tools/msa/clustalo/>

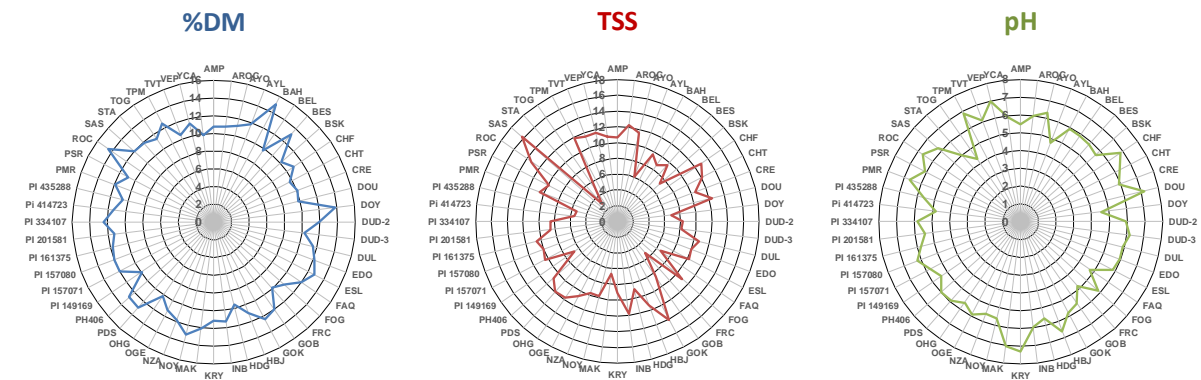

a)

| Overview (n=52) | DM content (%) | TSS (°Brix) | pH    |
|-----------------|----------------|-------------|-------|
| Mean            | 11.50          | 9.72        | 5.89  |
| Min             | 9.60           | 3.00        | 4.27  |
| Max             | 15.00          | 16.20       | 7.31  |
| CV (%)          | 10.42          | 26.16       | 11.02 |

b)

**Figure S2.** Variability of the 52 melon accessions for fruit quality global measurements: fruit flesh percent dry matter (%DM), and fruit juice total soluble solids (TSS) and pH. CV, coefficient of variation. a) radar plots for the 52 accession samples. b) overview.

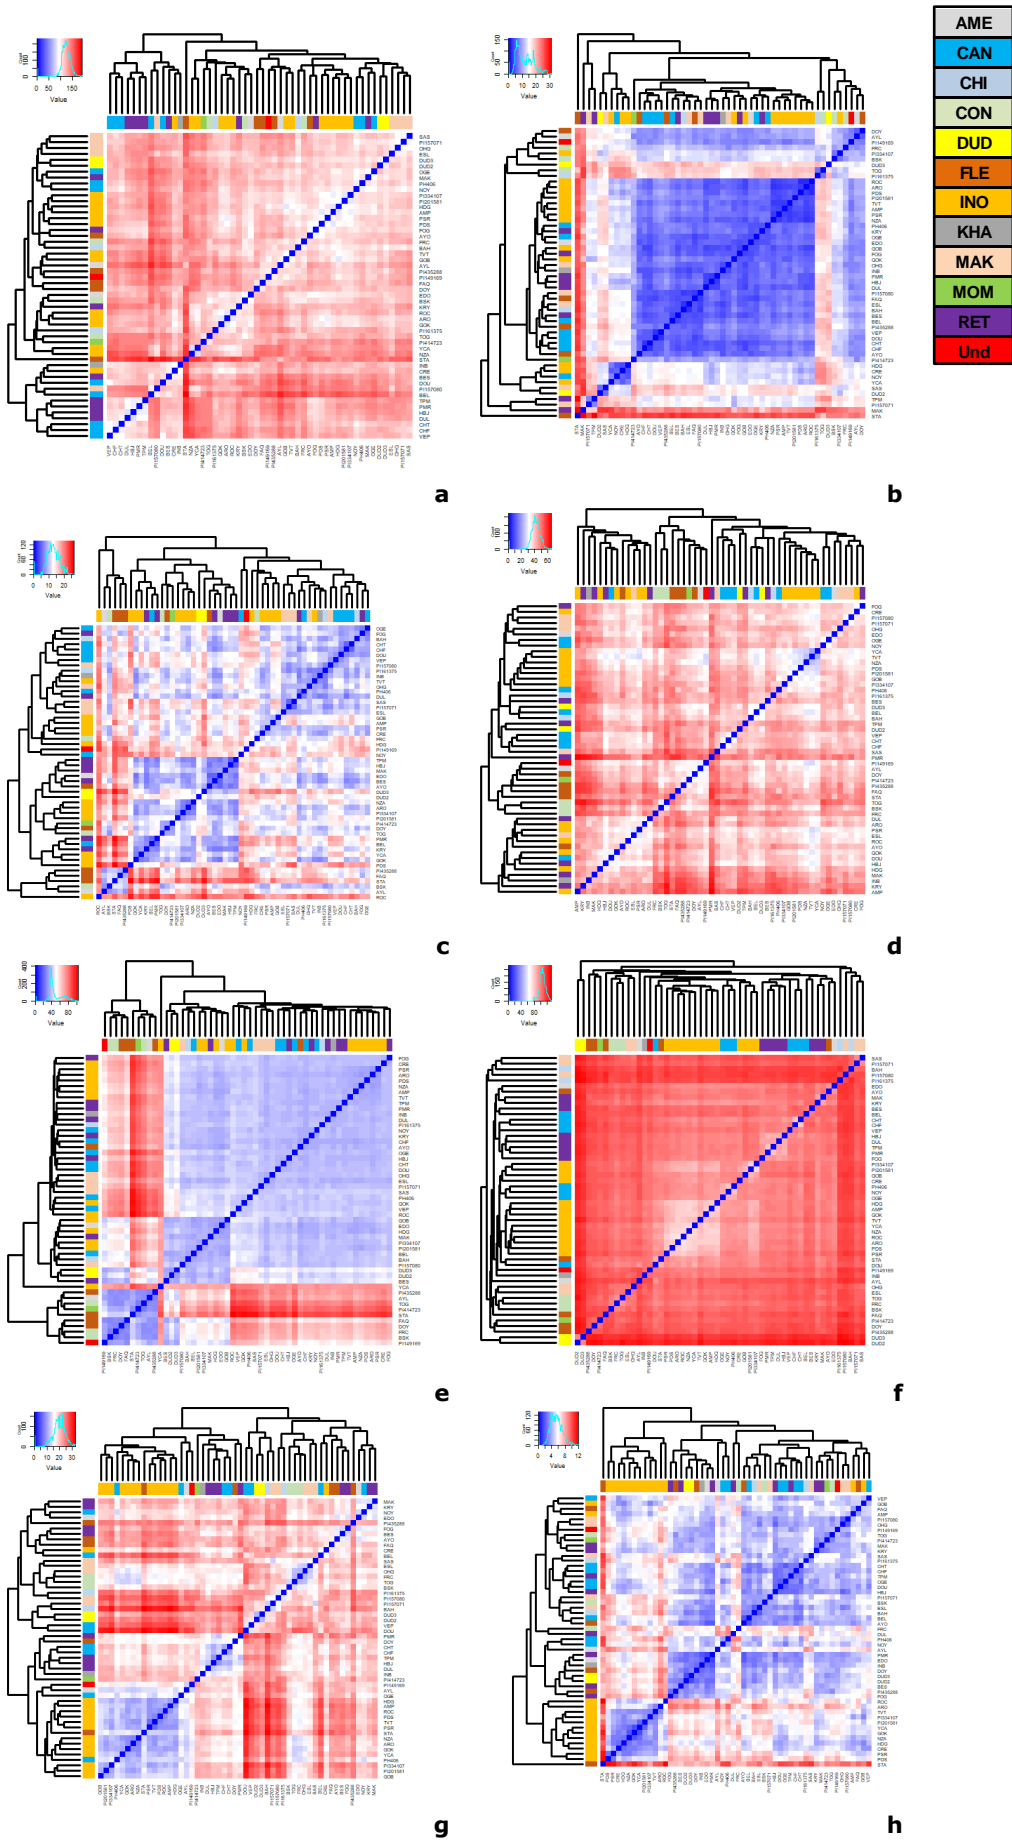

**Figure S3.** Hierarchical clustering analysis of the 52 melon accession samples based on each analytical platform for fruit flesh with Euclidian distance and complete linkage. Each subfigure represent an accession dendrogram with heatmaps for accession x accession distances. The colored bar close to the dendrogram indicates accession groups. The distribution of distances is presented on the upper left side of each subfigure. a) GC-MS of polar extracts; b)  $^1\text{H}$ -NMR profiles of polar extracts; c)  $^1\text{H}$ -NMR fingerprints of polar extracts; d)  $^1\text{H}$ -NMR fingerprints of semi-polar extracts; e) DI-MS of semi-polar extracts; f) LC-QTOF-MS of semi-polar extracts; g) SPME-GCMS of volatile compounds; h) ICP-MS of micronutrients.

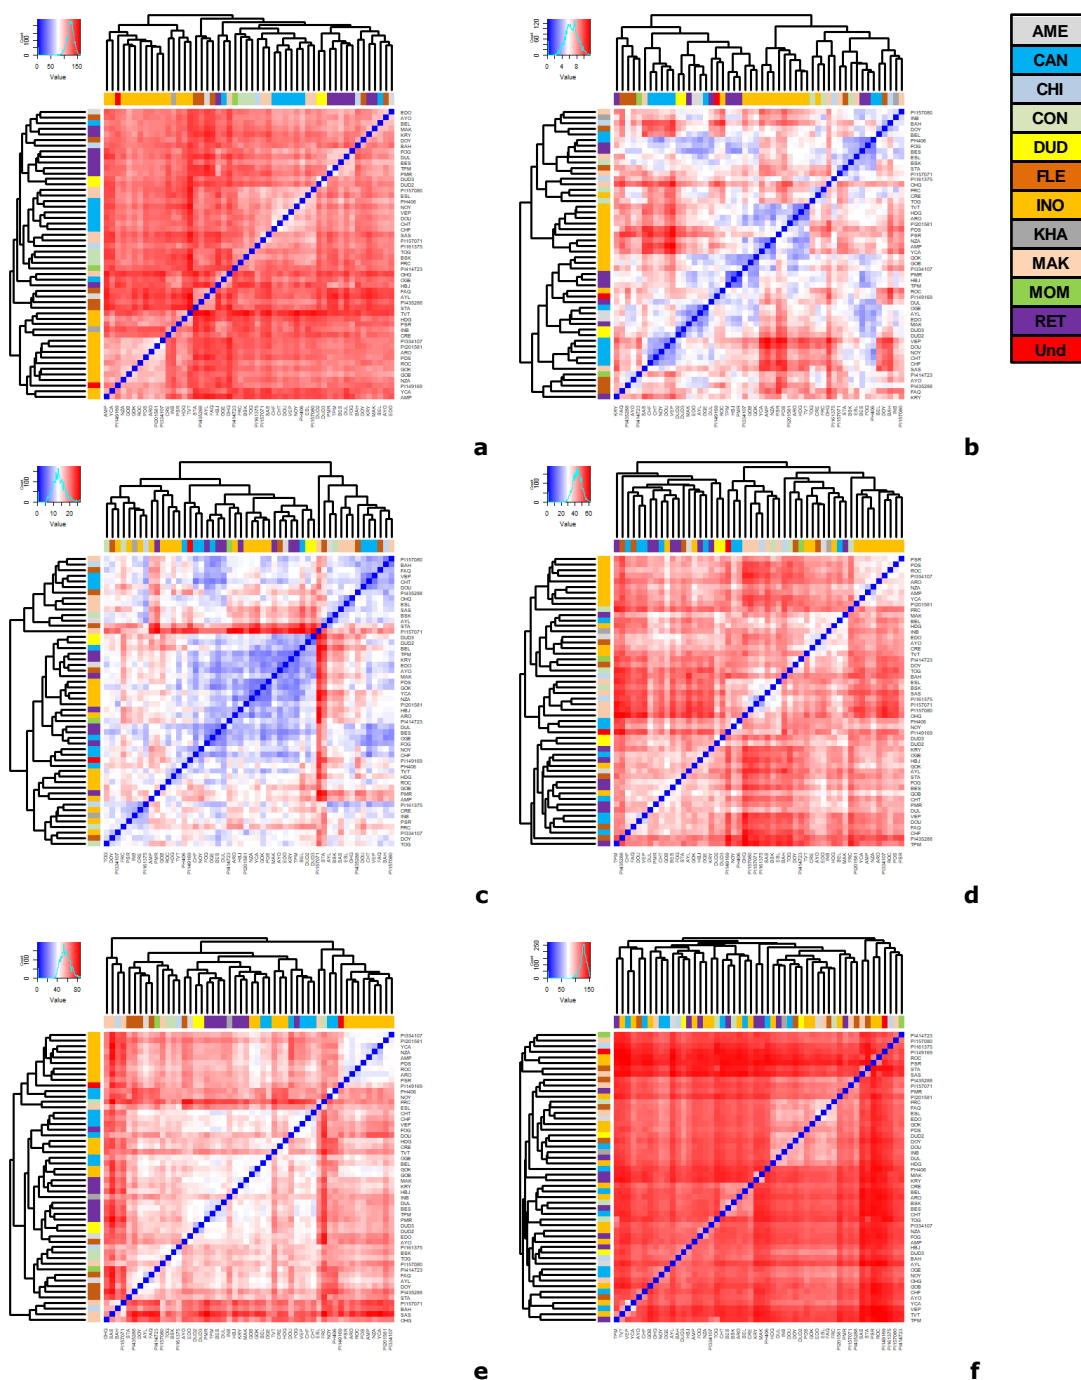

**Figure S4.** Hierarchical clustering analysis of the 52 melon accession samples based on each analytical platform for fruit peel with Euclidian distance and complete linkage. Each subfigure represent an accession dendrogram with heatmaps for accession x accession distances. The colored bar close to the dendrogram indicates accession groups. The distribution of distances is presented on the upper left side of each subfigure. a) GC-MS of polar extracts; b)  $^1\text{H}$ -NMR profiles of polar extracts; c)  $^1\text{H}$ -NMR fingerprints of polar extracts; d)  $^1\text{H}$ -NMR fingerprints of semi-polar extracts; e) DI-MS of semi-polar extracts; f) LC-QTOF-MS of semi-polar extracts
